# Supplementary material for: MCT-1 expression and PTEN deficiency synergistically promote neoplastic multinucleation through the Src/p190B signaling activation
Source: PubMed Central journal article supplement (PMC4287651; doi:10.1038/onc.2014.125), 2014-05-26

## Supplementary Figures

**Figure S1.** MCT-1 expression enhances the PI3K/AKT signaling. (a) MCF-10A cells starved in serum-free medium for 24 h were treated with LY294002 (PI3K inhibitor) for 4 h before serum activation for 30 min. LY suppressed the MCT-1-enhanced AKT phosphorylation (ser473). The increased PTEN phosphorylation (ser380) suggested that MCT-1 inhibited PTEN activity (lanes 5 and 6). (b) MCF-7 cells starved for 24 h were incubated with wortmannin for 4 h and then activated by serum/insulin for 30 min. Wortmannin effectively suppressed MCT-1-stimulated AKT phosphorylation (ser473). (c) MCF-10A cells starved for 24 h were then treated with LY, PP2 or UO for 4 h before activation with EGF (+EGF) or serum for 30 min. The MCT-1-induced AKT phosphorylation was well inhibited by LY and partly suppressed by PP2 but not by a MEK inhibitor, UO. (d) The MDA-MB-231 cells were cultured with 200  $\mu$ M cycloheximide for the indicated time intervals. The residual PTEN protein was examined after block of protein biosynthesis. (e) PTEN degradation rate and PTEN half-life were evaluated in MDA-MB-468 cells with or without increasing MCT-1 expression.

**Fig. S1**

**a**

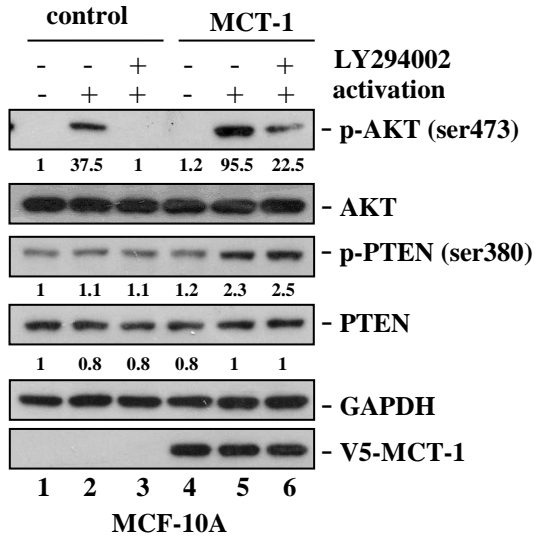

**b**

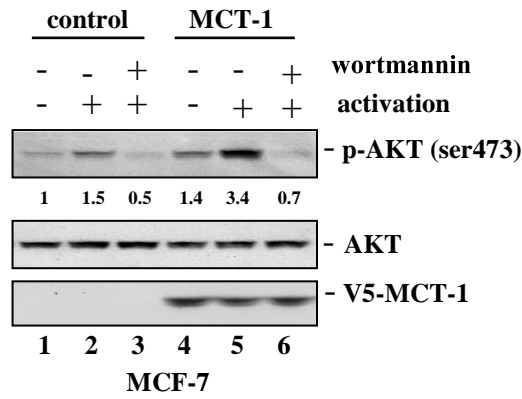

**c**

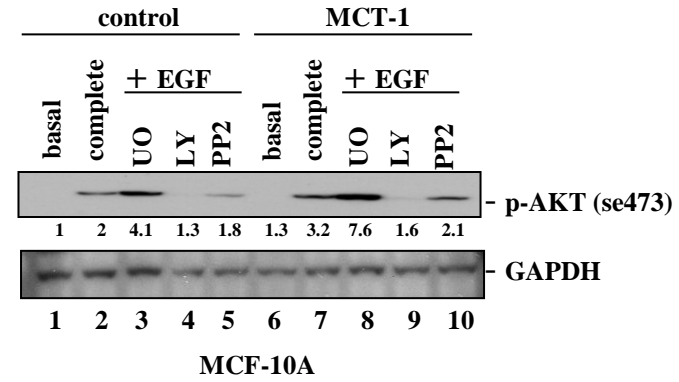

**d**

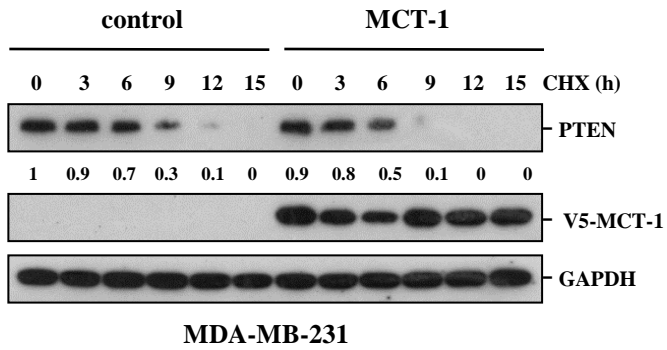

**e**

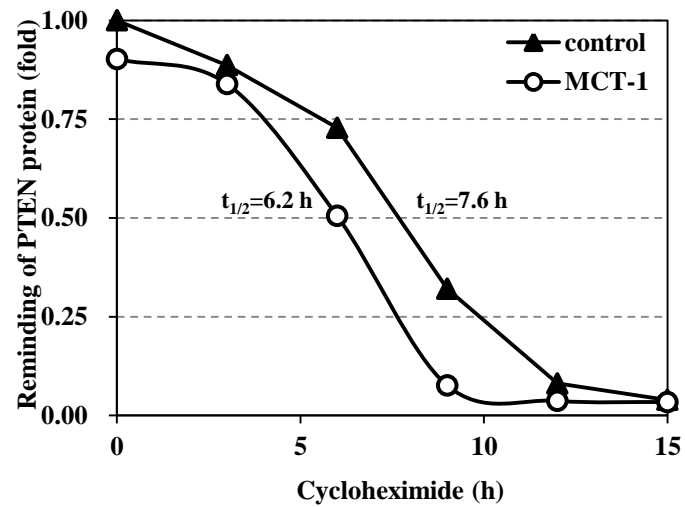

**Figure S2.** MCT-1 expression and PTEN deficiency synergistically promote spindle multipolarity and multinuclearity. MCF-10A cells with the indicated expression condition of MCT-1 and PTEN were examined. **(a)** Cells were exposed to nocodazole for 24 h and cultured in the nocodazole-free medium for 1 h. Spindle aster (NuMA staining, red), microtubule structure ( $\alpha$ -tubulin staining, green) and nuclear DNA (DAPI, blue) were assessed. **(b)** Cell populations with multiple spindle arrays were quantified. The numbers of cells scored in each cellular context were indicated. **(c)** Cells were exposed to nocodazole for 24 h and released for 1 h. Mitotic regulators p190B, NuMA and p-histone H3 were more expressed in the MCT-1/-PTEN cells than the other cohorts. **(d)** Time-lapse microscopy was conducted. The control/-PTEN cell entered mitosis and divided into two daughter cells. Abortive abscission of the MCT-1/-PTEN cell was observed.

**Fig. S2**

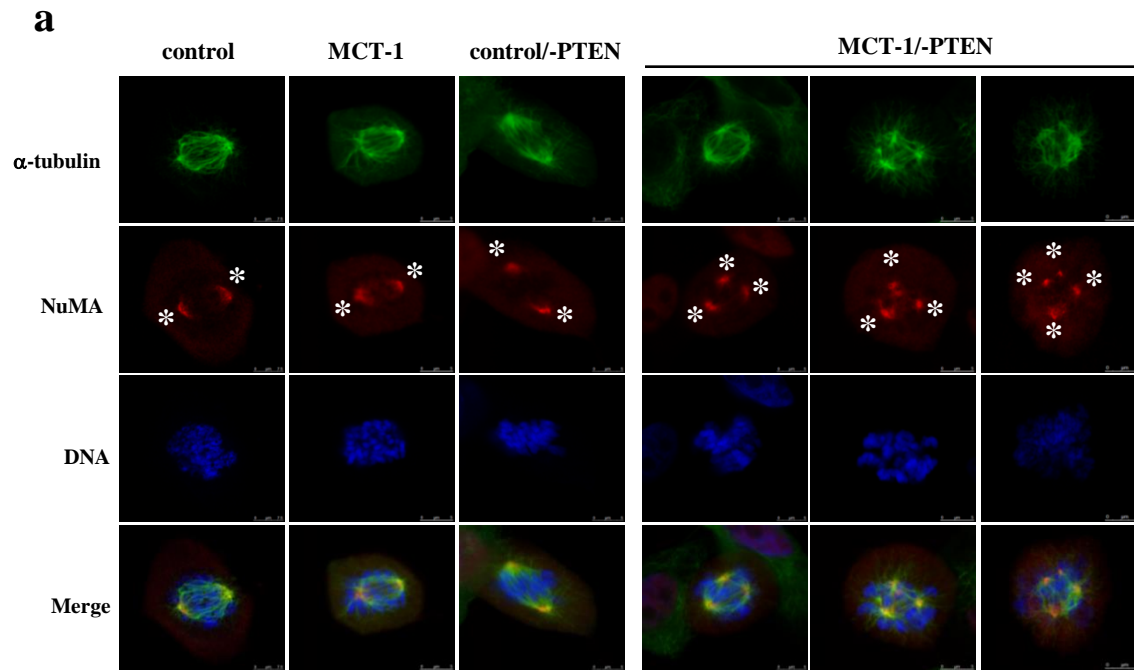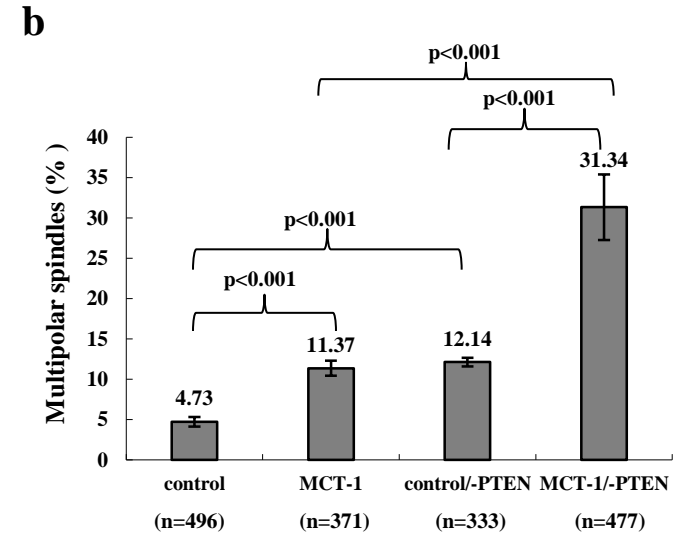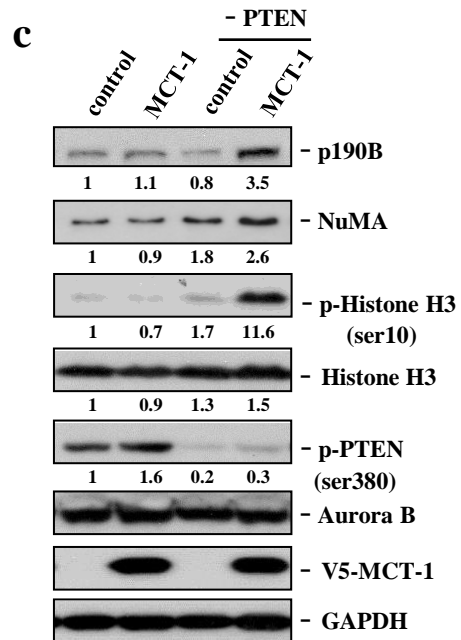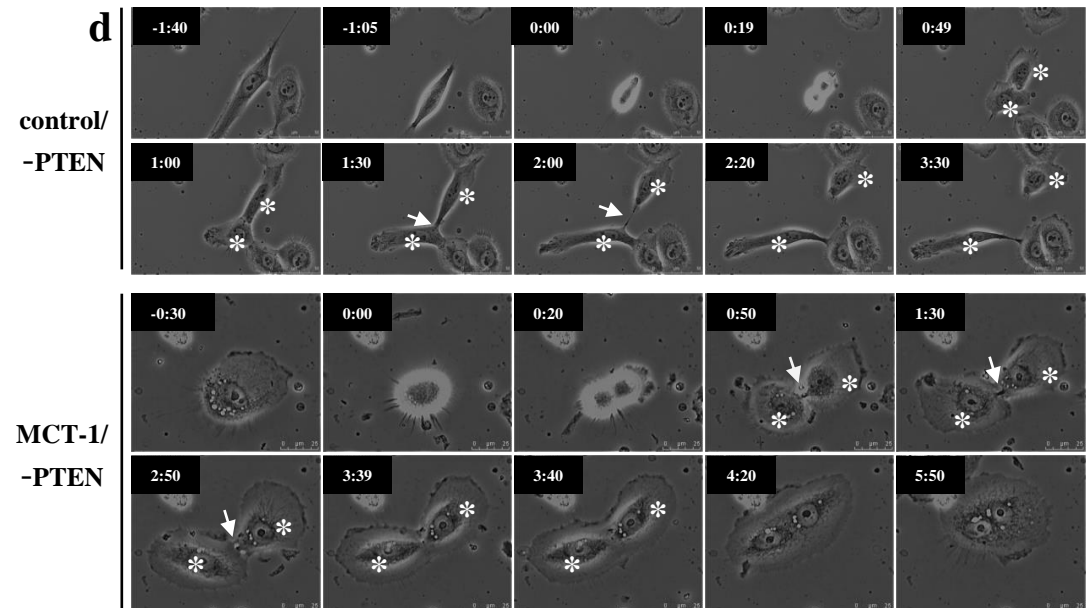

**Figure S3.** MCT-1 regulates *p190B* gene expression. MDA-MB-468 cells were examined. (a)

The mRNA levels of *MCT-1*, *p190B* and *p190A* in the vector control and MCT-1-overexpressing cells were analyzed by Q-RT-PCR. Expression levels of *p190B* but not *p190A* was stimulated by ectopic MCT-1 expression. (b) The *MCT-1*, *p190B* and *p190A* mRNA levels were analyzed in the cells with (shMCT-1) or without (MOCK) MCT-1 knockdown. Knockdown of MCT-1 suppressed *p190B* gene expression.

**Fig. S3**

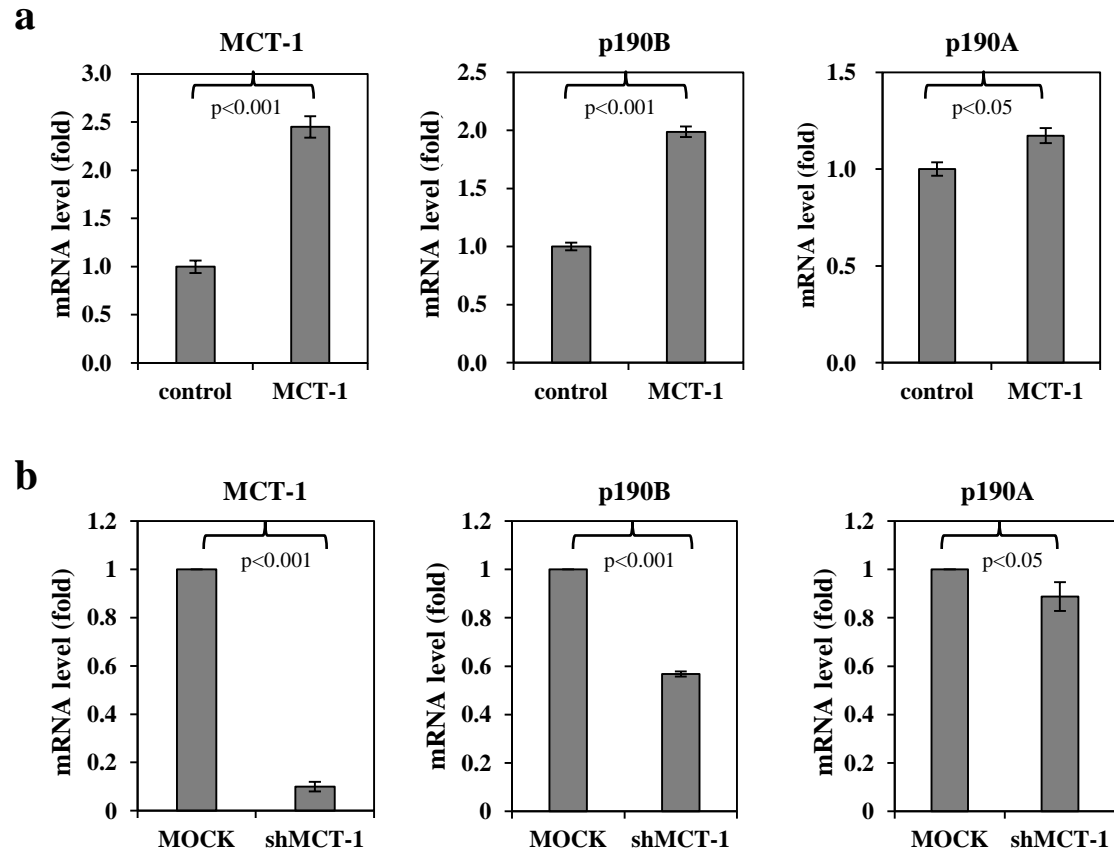

**Figure S4.** PTEN loss and MCT-1 activation synergistically promotes multinucleation. **(a)**

MCF-10A cells with the indicated expression condition of MCT-1 and PTEN were reactivated for 30 min after serum starvation for 24 h. The active Src (tyr416) and p190B (p-tyr) levels were induced and the active RhoA (RhoA-GTP) was suppressed in MCT-1/-PTEN cells. **(b)** Multinuclear frequencies and numbers of cells scored in each group were indicated.

**Fig. S4**

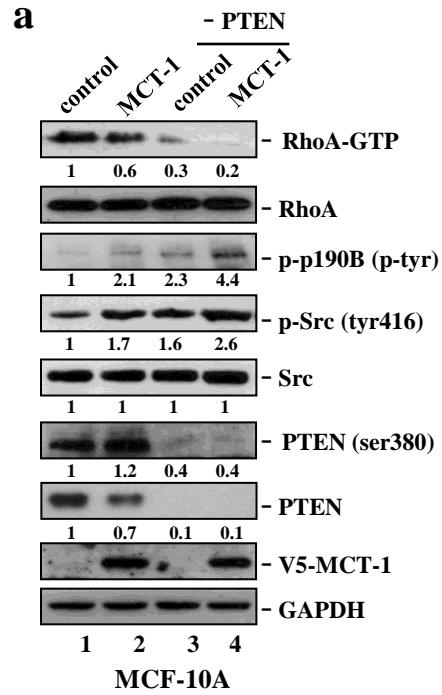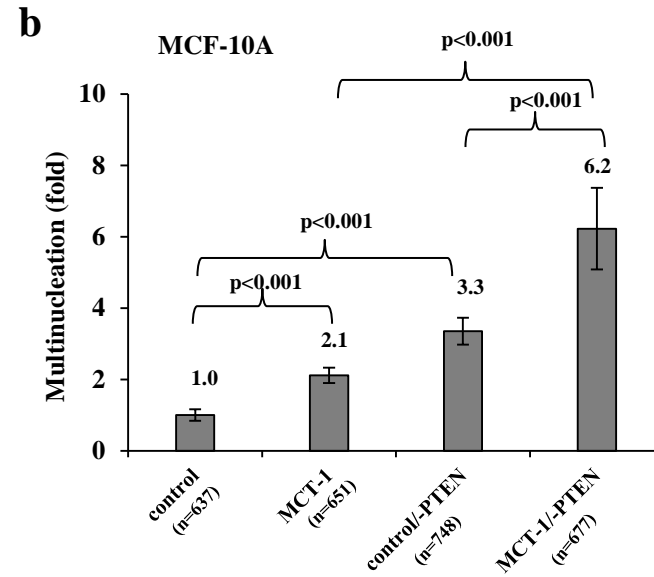



**Figure S5.** Overexpressing MCT-1 deregulates G2/M mitotic checkpoint. (a) After treatment with nocodazole or taxol, cell cycle profiling was examined by flow cytometry. The ectopic MCT-1 cells arrested at the G2/M stage were less than the control cells upon microtubule disruption. (b) The G2/G1 ratio upon mitotic arrest was analyzed. Reduced G2/G1 ratio may correspond to the G2/M checkpoint impaired in the ectopic MCT-1 cells.

**Fig. S5**

**a**

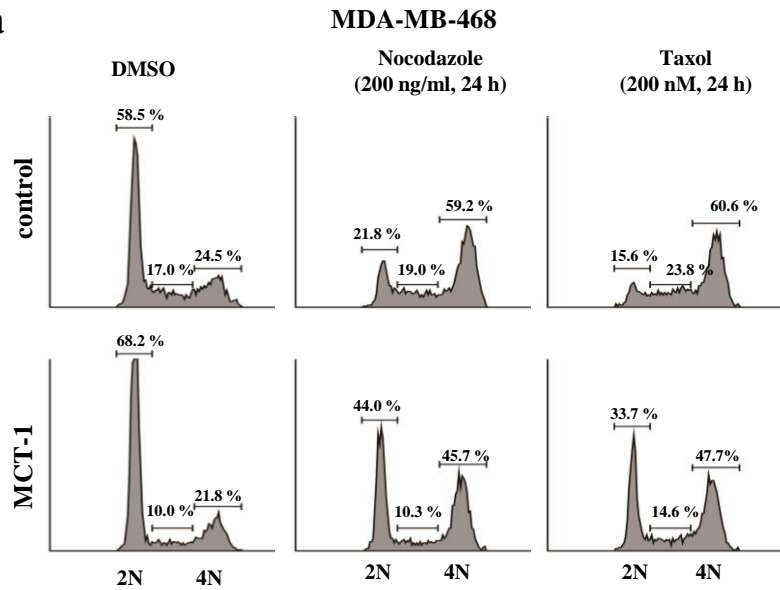

**b**

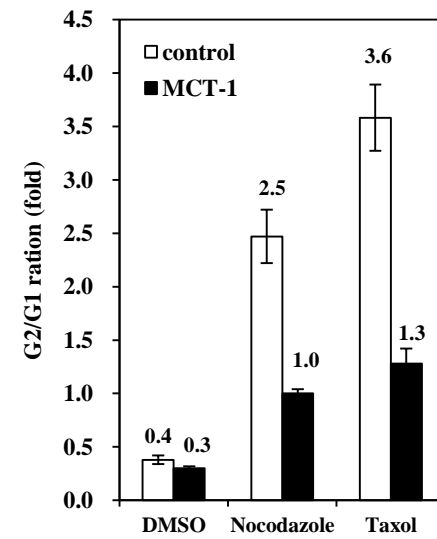

**Figure S6.** Chromosomal abnormalities induced by the overexpression of MCT-1. For the whole genome comparison between the MCT-1 overexpression (test) and control (reference) MCF-10A cells, their genomic DNA samples were individually labeled with Cy3 and Cy5. (a) Chromosome 5p showed a long region with a deletion score of -0.3. (b) Chromosome 7q revealed only a short region with a deletion score of -0.4, followed by a long region with an amplification score of +0.3. (c) Chromosome 18 contained a large area with amplification scores greater than the 0.2 cutoff.

**Fig. S6**

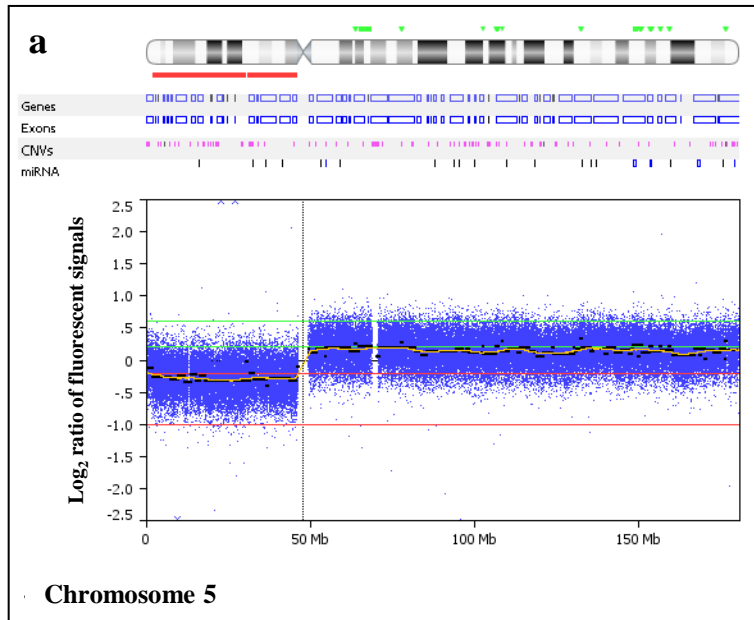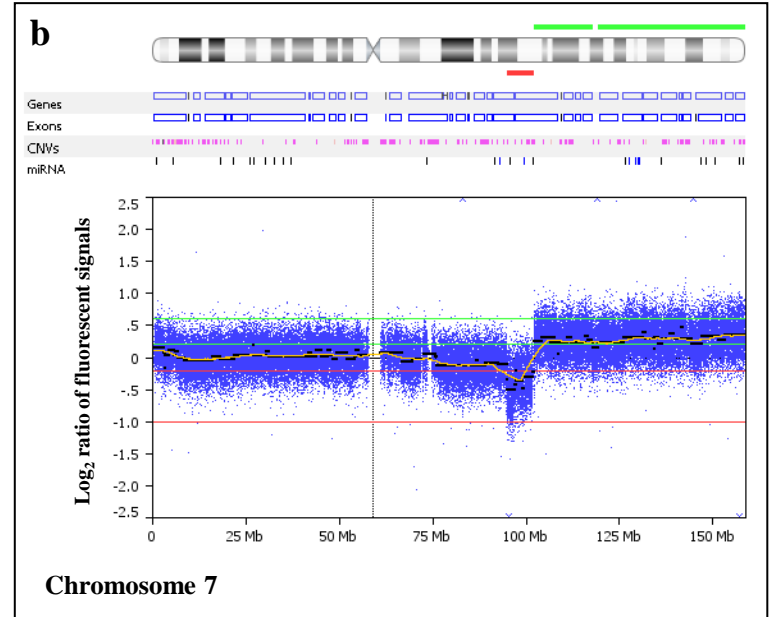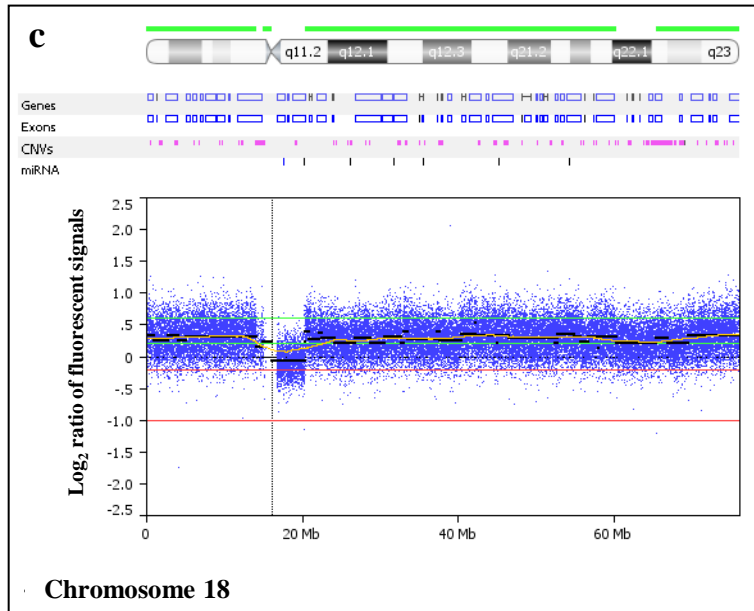

Supplement: onc2014125x1.pdf [file onc2014125x1.pdf]
